# Supplementary material
Source: publisher site journal article supplement (https://www.spandidos-publications.com/4497/downloadSupplementary)
Supplement: Supplementary file 1 [file downloadSupplementary]

Table SI. Univariate Cox regression analyses for overall survival in patients with different P4HB expression and MGMT methylation status.

| Variable                                                                     | HR    | 95% CI       | P-value |
|------------------------------------------------------------------------------|-------|--------------|---------|
| Unmethylated MGMT<br>P4HB expression <sup>a</sup> [low (< 1) vs. High (≥ 1)] | 1.038 | 0.372-2.892  | 0.944   |
| Methylated MGMT<br>P4HB expression <sup>a</sup> [low (< 1) vs. High (≥ 1)]   | 4.261 | 1.312-13.846 | 0.016   |

HR, hazard ratio; P4HB, prolyl 4-hydroxylase beta polypeptide; MGMT, O6-methylguanine-DNA methyltransferase.

<sup>a</sup>P4HB<sup>Low</sup> and P4HB<sup>High</sup> were stratified based on the median value.
